# Supplementary material for: Stem cells purified from human induced pluripotent stem cell-derived neural crest-like cells promote peripheral nerve regeneration
Source: PubMed Central journal article supplement (PMC6030210; doi:10.1038/s41598-018-27952-7), 2018-07-03
Supplement: 41598_2018_27952_MOESM1_ESM.pdf [file 41598_2018_27952_MOESM1_ESM.pdf]

**Stem cells purified from human induced pluripotent stem cell-derived neural crest-like cells promote peripheral nerve regeneration**

Hiroo Kimura, Takehito Ouchi, Shinsuke Shibata, Tsuyoshi Amemiya, Narihito Nagoshi, Taneaki Nakagawa, Morio Matsumoto, Hideyuki Okano, Masaya Nakamura, Kazuki Sato

Supplement Figure Legends, Supplement Table. 1, and Supplement Figure. 1 ~ 10

**Supplement Table 1. List of antibodies used in this study.**

**Supplement Figure 1. LNGFR(+)THY-1(+) cells in NCLCs derived from 201B7, another iPSCs line.**

Flow cytometric analysis was performed by using another iPSC line 201B7, differentiated into NCLCs. The induction efficiency for LNGFR(+)THY-1(+) was 20.5 ± 0.8%.

**Supplement Figure 2. Flow cytometric analysis of single-positive and double-negative fraction.**

Flow cytometric analysis revealed that single-positive [LNGFR(+)THY-1(-), LNGFR(-)THY-1(+)], and double-negative [LNGFR(-)THY-1(-) cells] fractions showed limited expression of NCC/MSC markers, including CD49d, CD57, CD29, CD73, CD105, CD140a and CD146.

**Supplement Figure 3. NCC/MSC marker double-positive cells following NCLC induction.**

Flow cytometric analysis revealed subsets of cells in the fraction double-positive for NCC/MSC markers, including NCC markers against LNGFR (CD271), CD49d and MSC markers against CD29, CD73, CD105, CD140a, CD146 and THY-1 (CD90).

**Supplement Figure 4. Differentiated LT-NCLCs express both NCC and MSC markers.**

Immunostaining of LT-NCLCs in NCC induction medium revealed that some differentiated LT-NCLCs were double-positive for the NCC marker CD57 and the MSC marker CD140a (arrow heads). Scale bar, 100 µm.

**Supplement Figure 5. Expression level of NCC and MSC transcriptional factors in differentiated LT-NCLCs**

(a) Various kinds of core transcriptional factors related to NCC / MSC development and differentiation were evaluated by immunocytochemistry in differentiated LT-NCLCs. The expression of FoxD3, Slug and AP2α were frequently detected—these are important for NCC lineage differentiation. High to intermediate levels of SOX9, Pax3, and Pax7 expression were detected; these are known as regulators of both NCC and MSC lineages. Among MSC lineage differentiation transcription factors, Foxp1 and GATA6 were moderately expressed, while Runx2 and PPARγ were

not expressed in differentiated LT-NCLCs. Scale bar, 50  $\mu$ m.

(b) Quantitative data for the expression of these core transcriptional regulators are shown, indicating that differentiated LT-NCLCs exhibit heterogeneity for NCC and MSC lineages.

#### **Supplement Figure 6. Surgical images of experimental groups.**

(a-c) The exposed sciatic nerve was resected and repaired by nerve conduit.

(d-f) Re-exposed sciatic nerves at 12 weeks after the transplantation in the NC (d), TP (e), and Auto groups (f).

#### **Supplement Figure 7. Migration of the grafted cells.**

(a) Engrafted cells were stained with HNA and Hoechst. (b) Grafted cells migrated and evenly distributed throughout the nerve conduit in silicone tube. Scale bar, 100  $\mu$ m. NS, non-significant.

#### **Supplement Figure 8. Immunostaining of myelinated axons in control groups.**

Images of immunohistochemistry of the NC, Auto, and Sham groups, stained for P0, Peripherin, and STEM12 in middle axial sections at 12 weeks after transplantation. Myelinated axons were slightly detected in the NC group. No STEM121-positive cells were detected in all groups. Scale bar, 10  $\mu$ m.

#### **Supplement Figure 9. Disappearance of the NCC/MSC markers in grafted cells.**

Immunohistochemical analysis for the engrafted cells stained with NCC marker CD49d and MSC marker CD146 with Hoechst demonstrated that survived engrafted cells lost expression of NCC/MSC markers 12-weeks after transplantation. Scale bar, 100  $\mu$ m.

#### **Supplement Figure 10. Expression of neurotrophic and angiogenic factors in differentiated LT-NCLCs.**

Differentiated LT-NCLCs started to express neurotrophic factor BDNF and angiogenic factor VEGF more strongly compared to iPSCs. Scale bar, 50  $\mu$ m.

Marker List (FACS; fluorescence activated cell sorting, IHC; immunohistochemistry, ICC; immunocytochemistry, iEM; immuno-electron microscopic analysis)

| Primary Antibody                                                      | Property                                                       | Company                                     | Host    | Clone        | Use(conjugation/dilution)   |
|-----------------------------------------------------------------------|----------------------------------------------------------------|---------------------------------------------|---------|--------------|-----------------------------|
| CD271, low-affinity nerve growth factor receptor; LNGFR               | Mesenchymal stem cell marker, Neural crest lineage cell marker | Miltenyi Biotec, Bergisch Gladbach, Germany | mouse   | ME20.4-1.H4  | FACS (APC)                  |
| CD90, thymocyte antigen-1; THY-1                                      | Mesenchymal stem cell marker                                   | BD Biosciences, CA, USA                     | mouse   | 5E 10        | FACS (FITC)                 |
| CD49d, integrin alpha-4                                               | Neural crest lineage cell marker                               | BioLegend, CA, USA                          | mouse   | 9F10         | FACS (PE Cy7)<br>IHC (1:50) |
| CD57, human natural killer-1; HNK-1                                   | Neural crest lineage cell marker                               | Chemicon, Darmstadt, Germany                | mouse   | NK-1         | FACS (PE)<br>ICC (1:100)    |
| CD29, integrin beta-1                                                 | Mesenchymal stem cell marker                                   | BioLegend, CA, USA                          | mouse   | TS2/16       | FACS (PE)                   |
| CD73, 5'-nucleotidase; 5-NT                                           | Mesenchymal stem cell marker                                   | BioLegend, CA, USA                          | mouse   | AD2          | FACS (PE)                   |
| CD105, endoglin                                                       | Mesenchymal stem cell marker                                   | BioLegend, CA, USA                          | mouse   | 43A3         | FACS (PE)                   |
| CD140a, platelet-derived growth factor receptor alpha; PDGFR $\alpha$ | Mesenchymal stem cell marker                                   | BioLegend, CA, USA                          | mouse   | 16A1         | FACS (PE)<br>ICC (1:100)    |
| CD146, melanoma cell adhesion molecule; MCAM                          | Mesenchymal stem cell marker                                   | BioLegend, CA, USA                          | mouse   | SHM-57       | FACS (PE)<br>IHC (1:50)     |
| FoxD3, forkhead box protein D3                                        | Neural crest lineage cell marker                               | Abcam, Cambridge, UK                        | rabbit  | <polyclonal> | ICC (1:250)                 |
| Slug, Snail2, Snail homolog 2                                         | Neural crest lineage cell marker                               | Abcam, Cambridge, UK                        | rabbit  | <polyclonal> | ICC (1:500)                 |
| AP2 $\alpha$ , activator protein 2 alpha                              | Neural crest lineage cell marker                               | Cell Signaling Technologies, MA, USA        | rabbit  | C83E10       | ICC (1:100)                 |
| SOX9, SRY-related HMG-box 9                                           | Mesenchymal stem cell marker, Neural crest lineage cell marker | Santa Cruz Biotechnology, TX, USA           | rabbit  | <polyclonal> | ICC (1:400)                 |
| Pax3, paired box gene 3                                               | Mesenchymal stem cell marker, Neural crest lineage cell marker | Abcam, Cambridge, UK                        | goat    | <polyclonal> | ICC (1:200)                 |
| Pax7, paired box gene 7                                               | Mesenchymal stem cell marker, Neural crest lineage cell marker | Santa Cruz Biotechnology, TX, USA           | mouse   | PAX7         | ICC (1:200)                 |
| FoxP1, forkhead box protein P1                                        | Mesenchymal stem cell marker                                   | OriGene Technologies, Inc., MD, USA         | mouse   | UMAB89       | ICC (1:100)                 |
| GATA6, GATA-binding factor 6                                          | Mesenchymal stem cell marker                                   | Thermo Fisher Scientific, MA, USA           | rabbit  | <polyclonal> | ICC (1:200)                 |
| Runx2, Runt-related transcription factor 2                            | Mesenchymal lineage cell marker                                | Abcam, Cambridge, UK                        | mouse   | Runx2        | ICC (1:100)                 |
| PPAR $\gamma$ , Peroxisome proliferator-activated receptor gamma      | Mesenchymal lineage cell marker                                | Santa Cruz Biotechnology, TX, USA           | mouse   | E-8          | ICC (1:200)                 |
| SOX10, SRY-related HMG-box 10                                         | Neural crest lineage cell marker                               | R&D Systems, MN, USA                        | goat    | <polyclonal> | ICC (1:200)                 |
| Peripherin                                                            | Neural cell marker                                             | Chemicon, Darmstadt, Germany                | rabbit  | <polyclonal> | ICC (1:200)<br>IHC (1:200)  |
| Krox20, Early growth response protein 2; EGR2                         | Schwann cell lineage marker                                    | Covance, NJ, USA                            | rabbit  | <polyclonal> | ICC (1:100)                 |
| OCT6, Octamer-binding factor 6 (Oct-6/Pou3f1)                         | Schwann cell lineage marker                                    | Santa Cruz Biotechnology, TX, USA           | goat    | <polyclonal> | ICC (1:200)                 |
| MBP, myelin basic protein                                             | Schwann cell lineage marker                                    | Abcam, Cambridge, UK                        | rat     | 12           | ICC (1:200)                 |
| P0, protein myelin zero                                               | Schwann cell lineage marker                                    | Aves Labs, OR, USA                          | chicken | <polyclonal> | ICC (1:200)<br>IHC (1:200)  |
| HNA, Human nuclear antigen; HNA                                       | Human cell specific marker                                     | Chemicon, Darmstadt, Germany                | mouse   | 235-1        | IHC (1:200)                 |
| Ki67                                                                  | Cell proliferation marker                                      | Novocastra, Newcastle, UK                   | rabbit  | <polyclonal> | IHC (1:1000)                |

|                                                                    |                                   |                           |        |              |                           |
|--------------------------------------------------------------------|-----------------------------------|---------------------------|--------|--------------|---------------------------|
| Human Cytoplasmic Marker, STEM121                                  | Human cell specific marker        | Stem Cells, Inc., CA, USA | mouse  | AB-121-U-050 | IHC (1:1000), iEM (1:500) |
| mouse CD31, platelet endothelial cell adhesion molecule-1; PECAM-1 | Endothelial cell marker           | BD Biosciences, CA, USA   | rat    | MEC13.3      | IHC (1:50)                |
| human CD31, platelet endothelial cell adhesion molecule-1; PECAM-1 | Endothelial cell marker           | BD Biosciences, CA, USA   | mouse  | WM59         | IHC (1:100)               |
| BDNF, Brain-derived neurotrophic factor                            | Signaling proteins (neurotrophic) | Abcam, Cambridge, UK      | rabbit | <polyclonal> | ICC (1:250)               |
| VEGF, Vascular endothelial growth factor                           | Signaling proteins (angiogenic)   | Bioss, MA, USA            | rabbit | <polyclonal> | ICC (1:250)               |

| <b>Secondary Antibody</b>                              | <b>Property</b>                | <b>Company</b>                    | <b>Host</b> | <b>Clone</b> | <b>Use(conjugation/dilution)</b>  |
|--------------------------------------------------------|--------------------------------|-----------------------------------|-------------|--------------|-----------------------------------|
| Goat anti-mouse/rabbit/chicken/rat IgG, anti-mouse IgM | species specific IgG detection | Thermo Fisher Scientific, MA, USA | goat        | <polyclonal> | ICC/IHC (1:1000) Alexa488/555/647 |
| Donkey anti-mouse/rabbit/goat IgG                      | species specific IgG detection | Thermo Fisher Scientific, MA, USA | donkey      | <polyclonal> | ICC/IHC (1:1000) Alexa488/555/647 |

**Supplementary Table 1. List of antibodies used in this study**

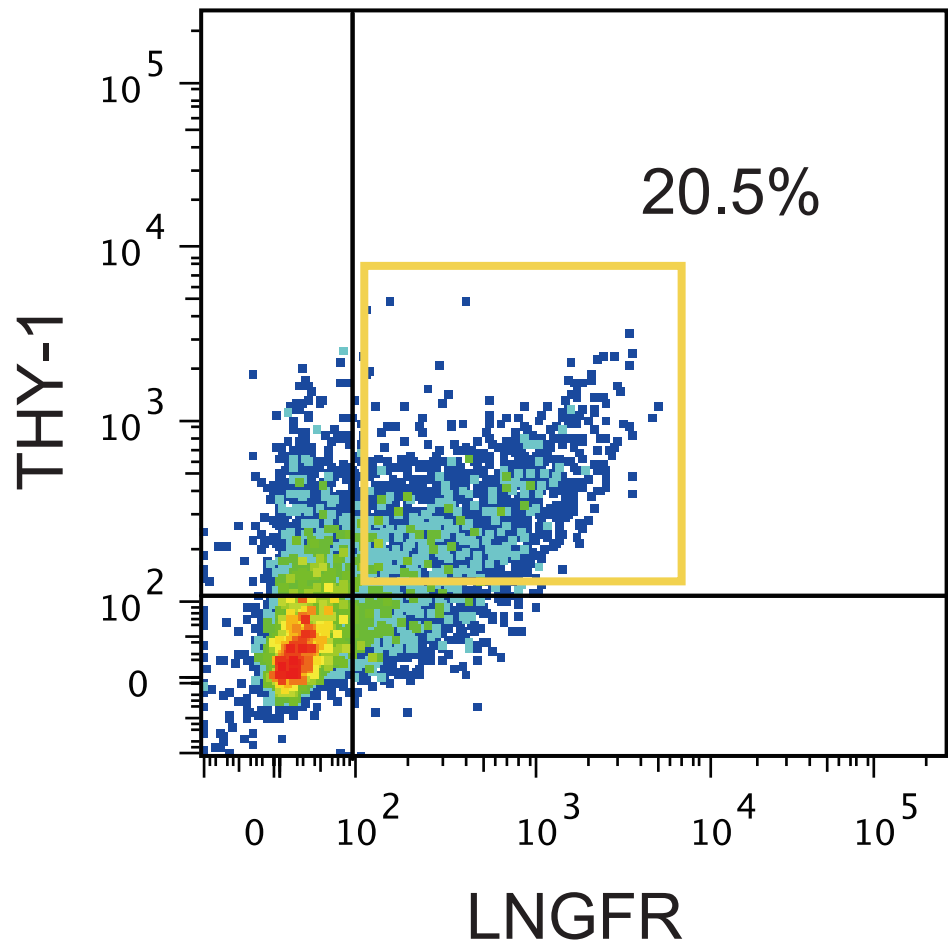

Supplement Figure. 1

(a)

LNGFR(+)THY-1(-) cells

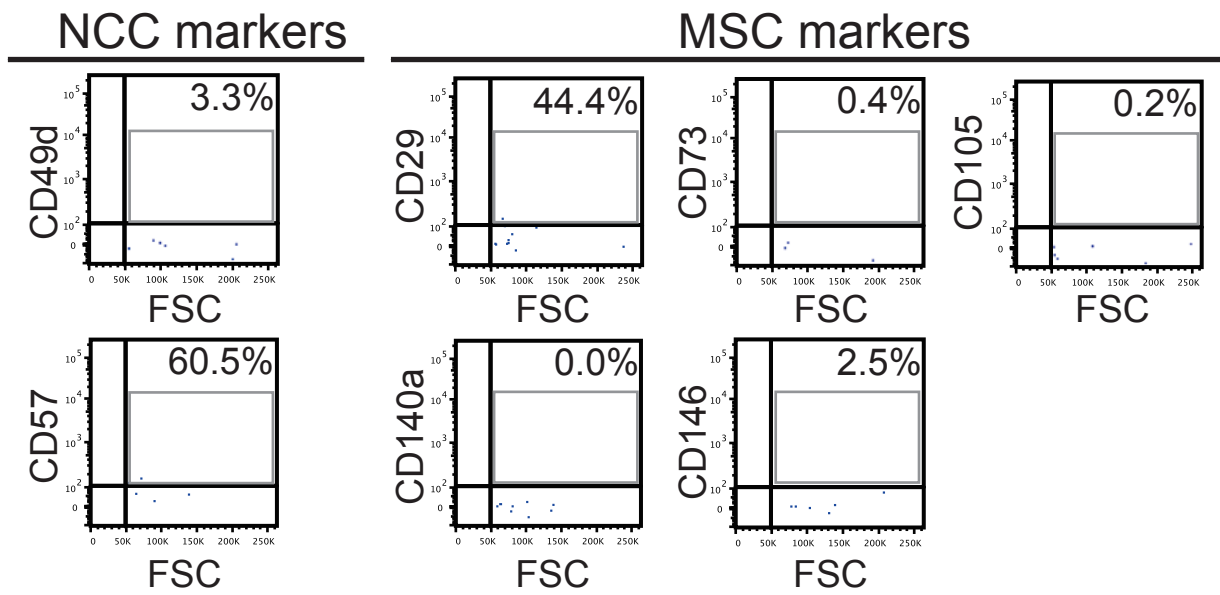

(b)

LNGFR(-)THY-1(+) cells

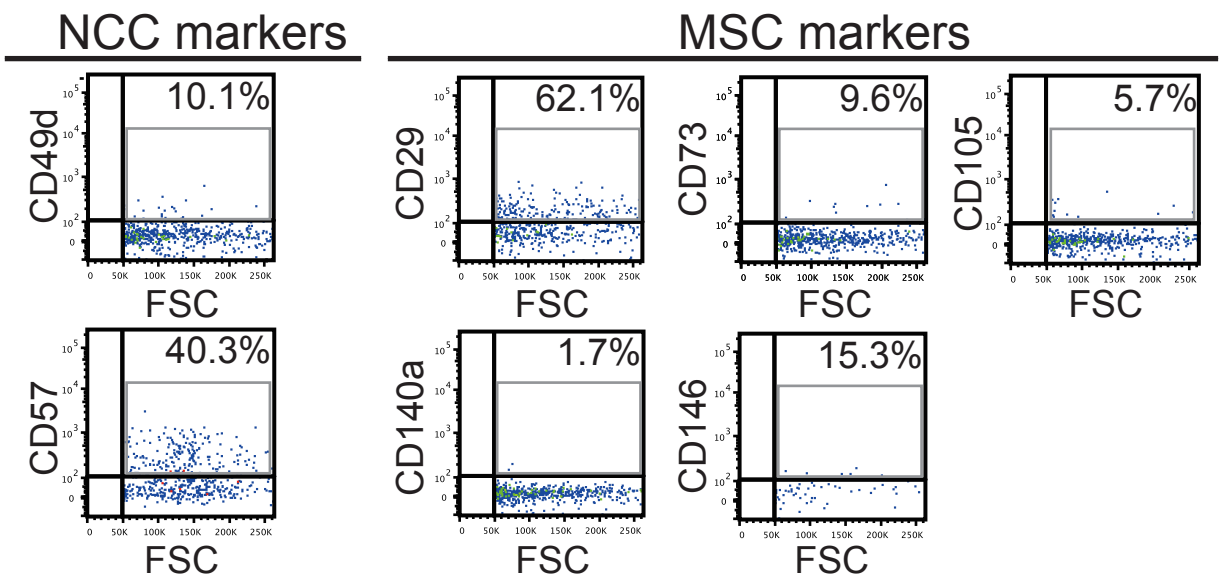

(c)

LNGFR(-)THY-1(-) cells

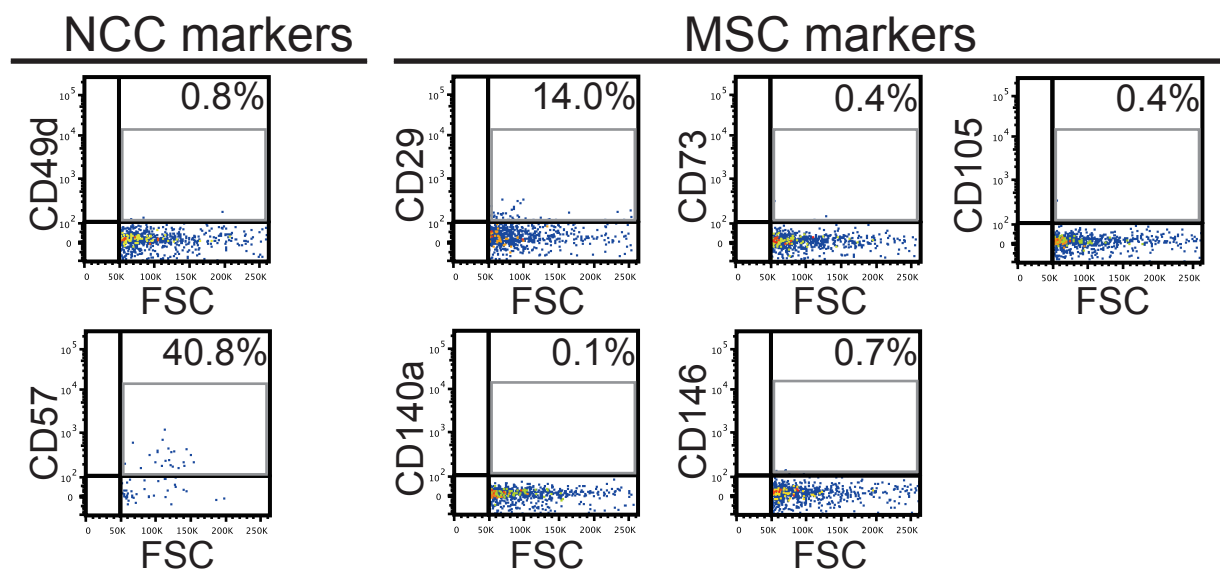

(a)

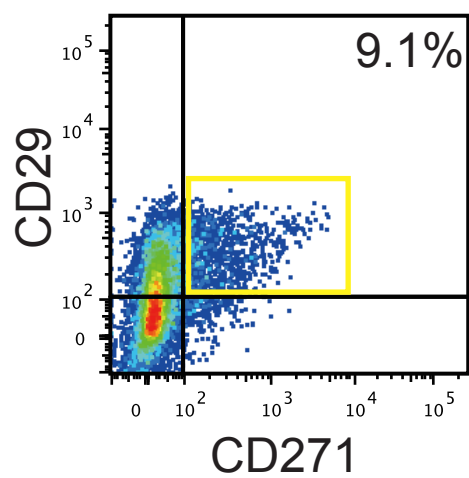

(b)

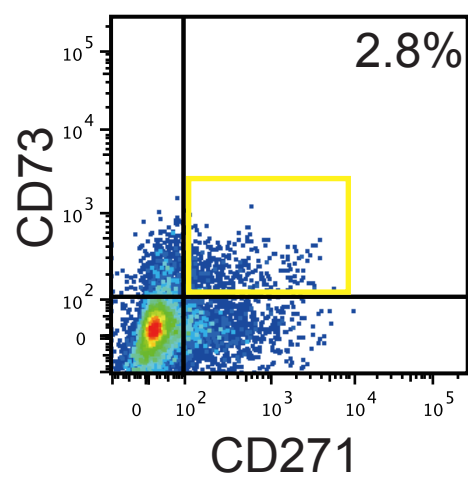

(c)

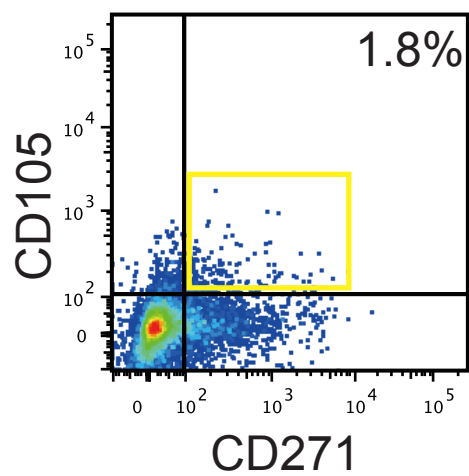

(d)

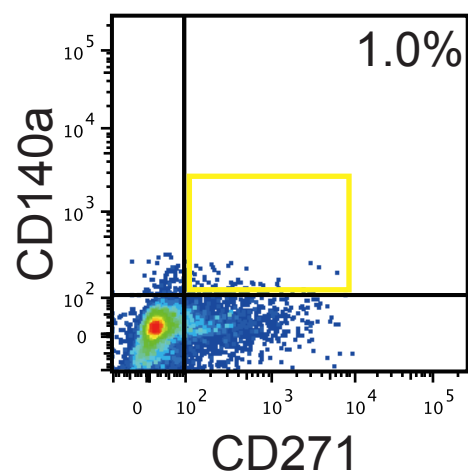

(e)

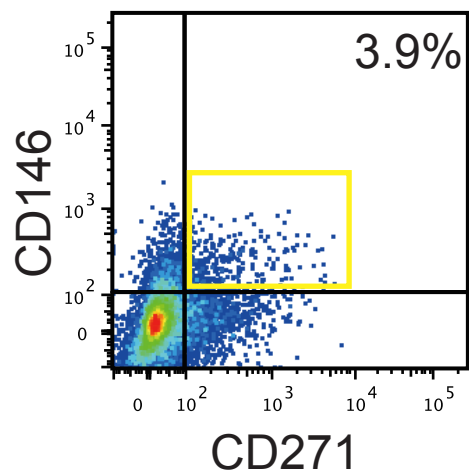

(f)

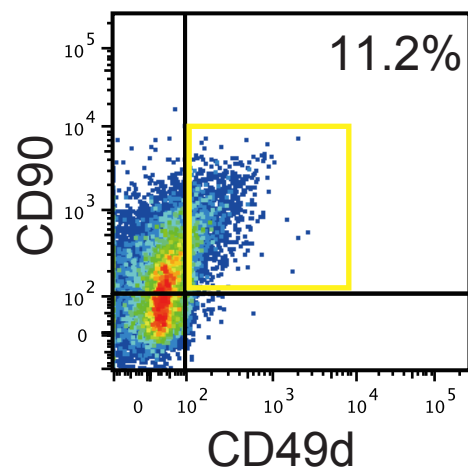

Supplement Figure. 3



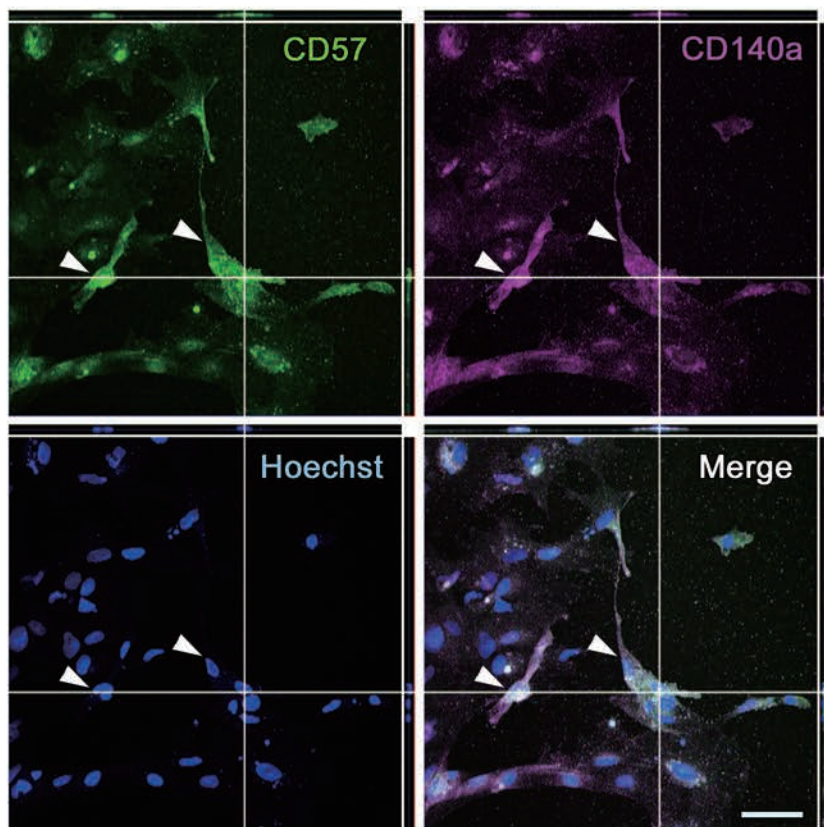

Supplement Figure. 4

(a)

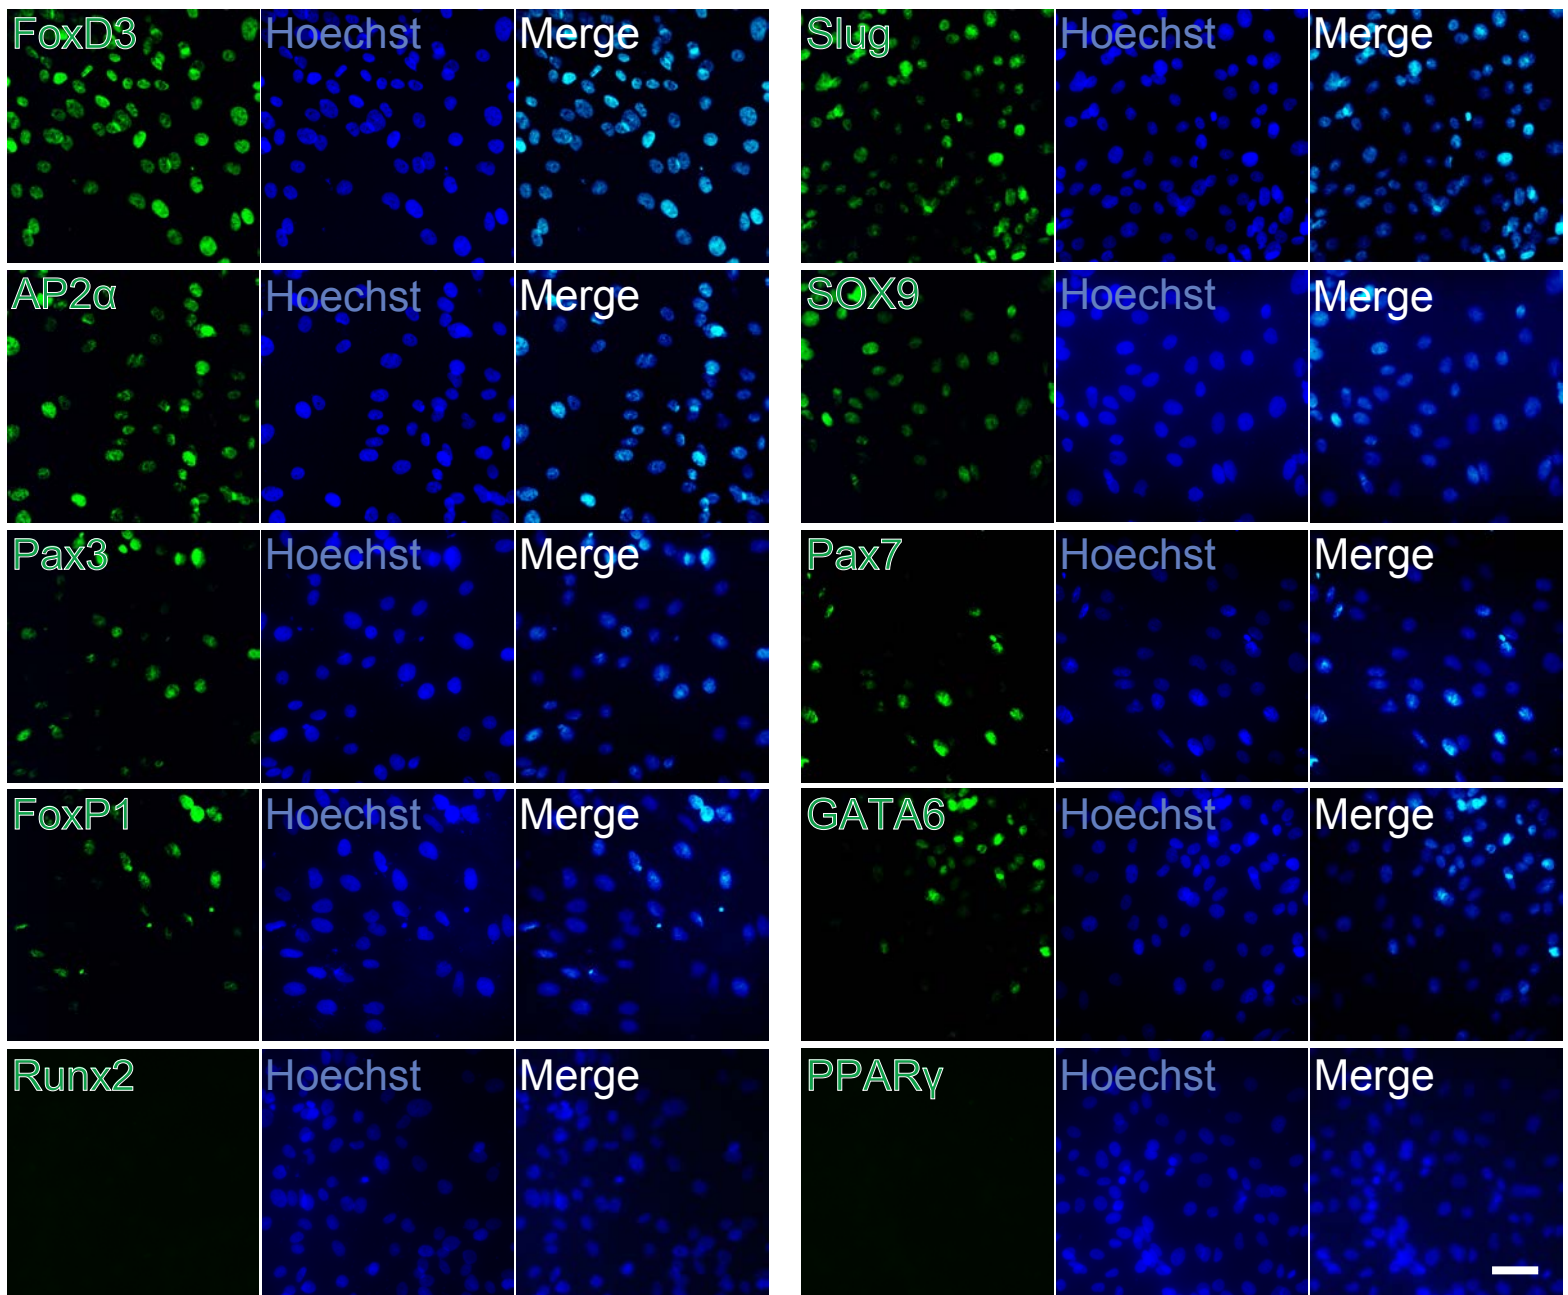

(b)

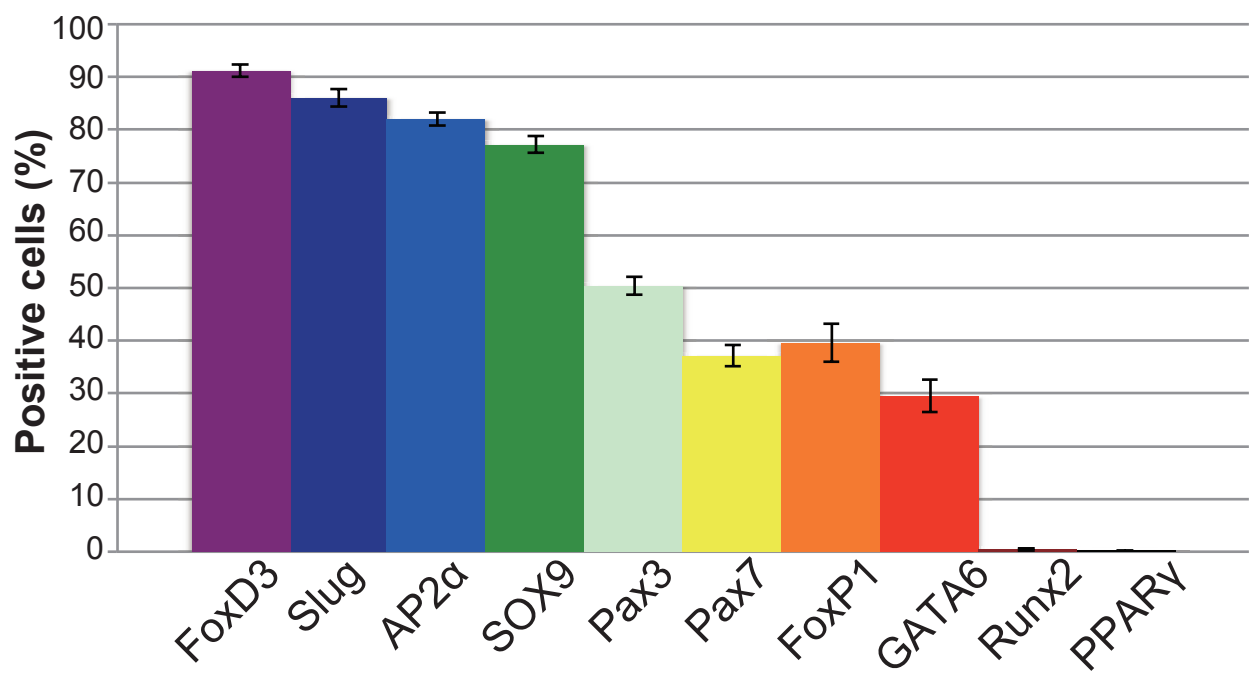

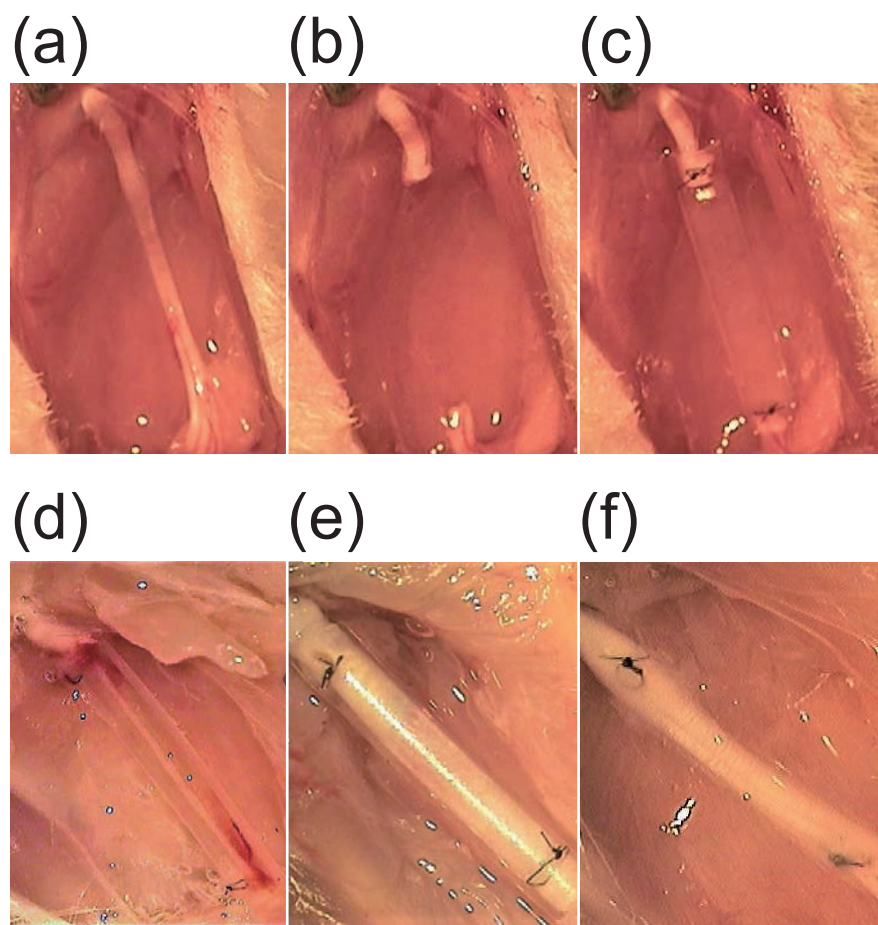

Supplement Figure. 6

(a)

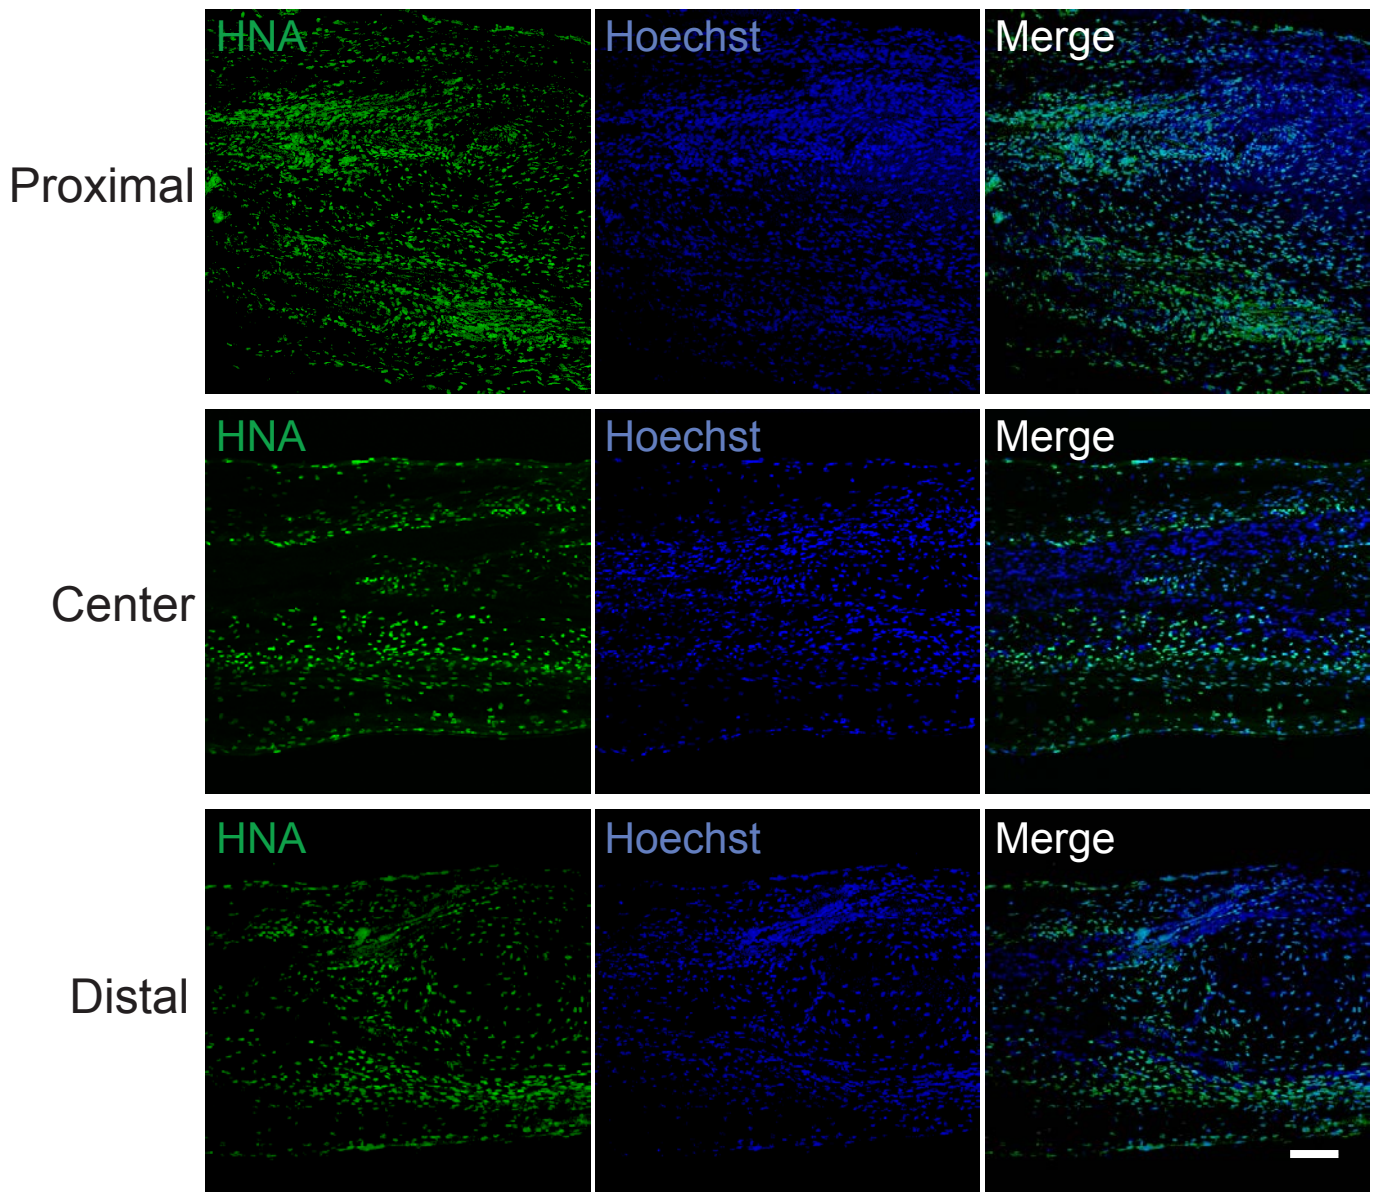

(b)

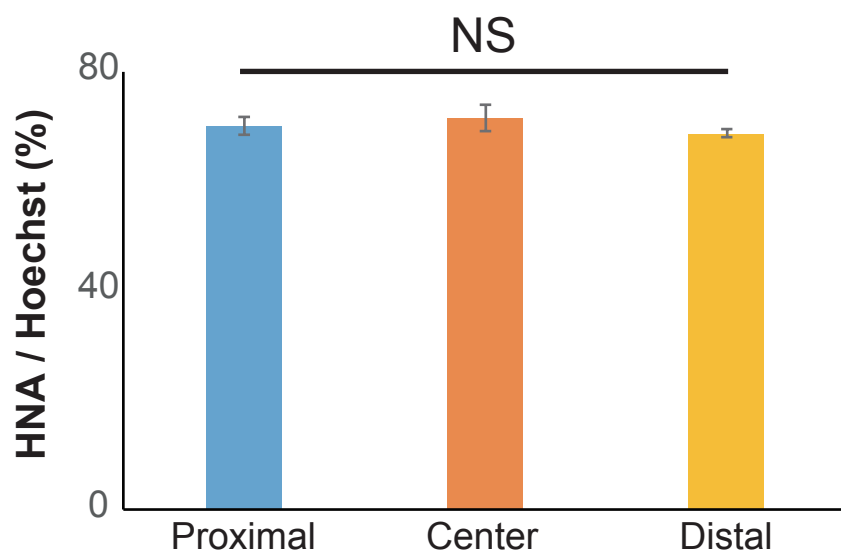

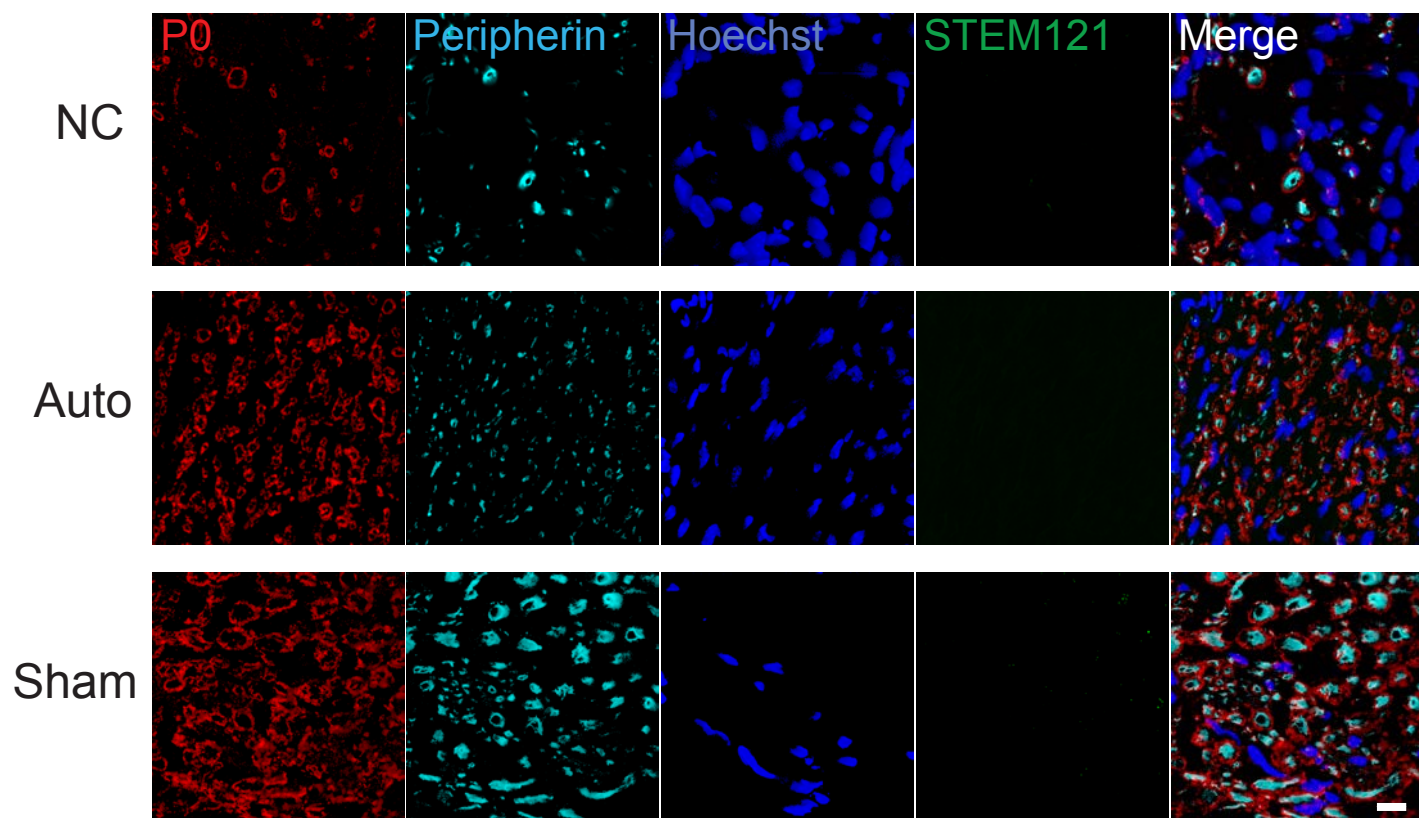

Supplement Figure. 8

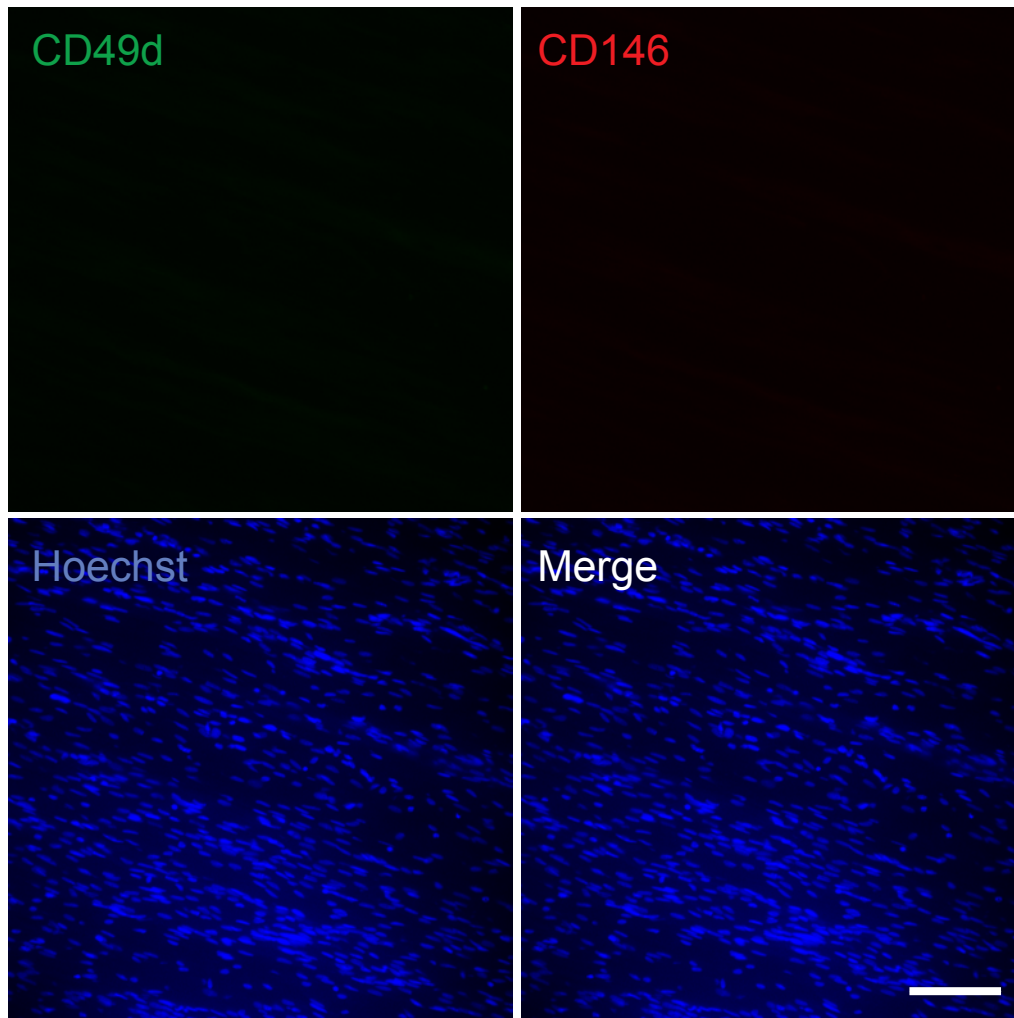

Supplement Figure. 9

(a)

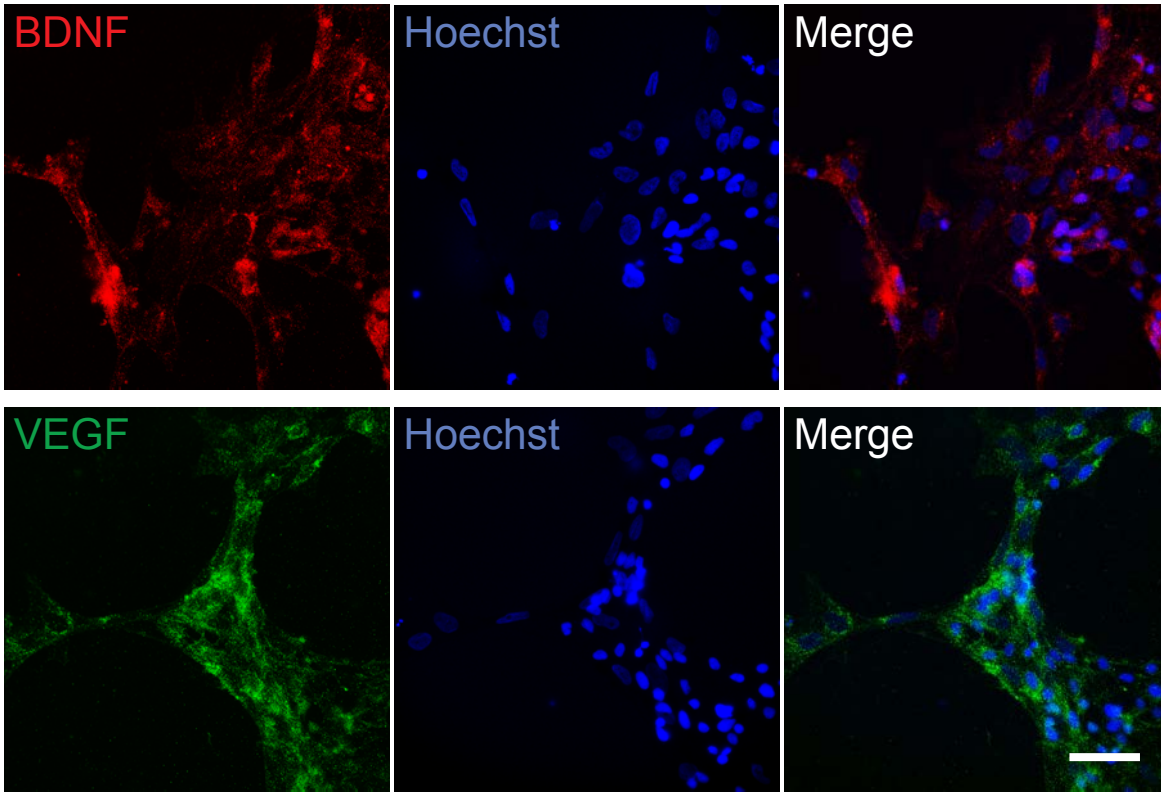

(b)

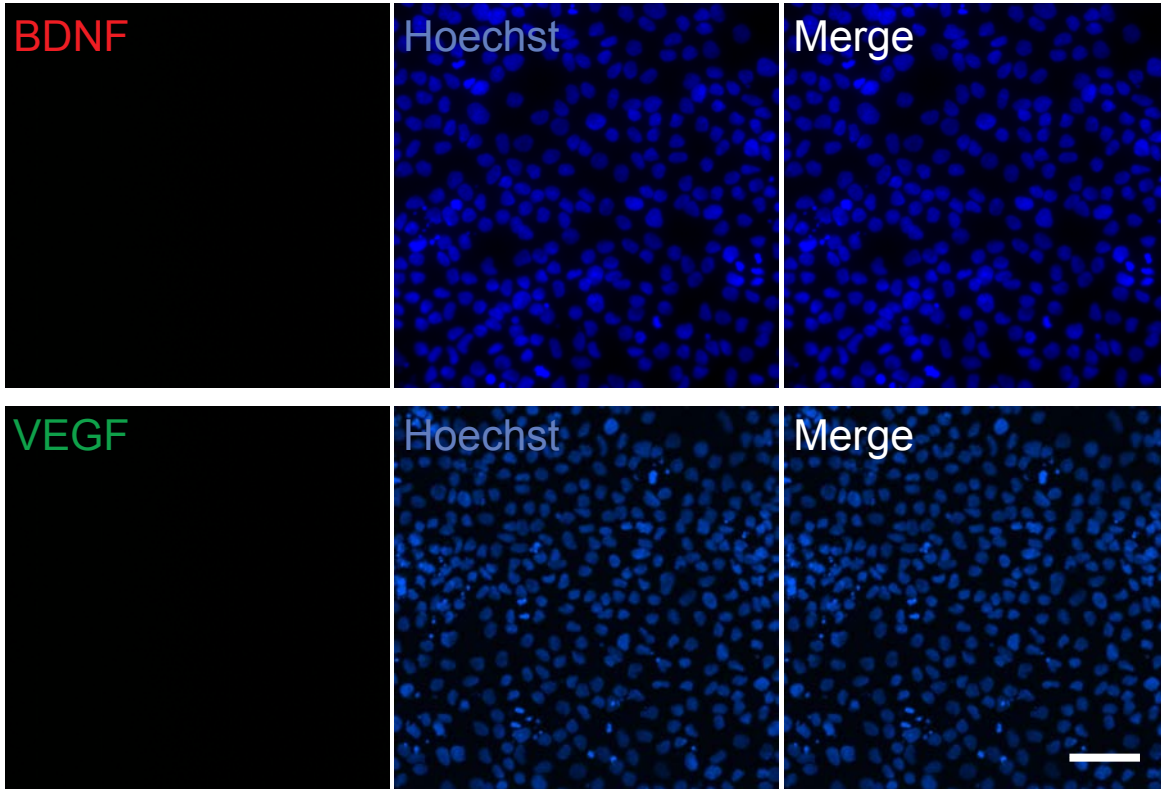

Supplement Figure. 10
